# Supplementary material for: Staphylococcus microti Strains Isolated from an Italian Mediterranean Buffalo Herd
Source: MDPI journal article supplement (doi:10.3390/ani13010182), 2023-01-03
Supplement: s1 [file s1]

**Table S1** – Bacterial species identification by MALDI-TOF of 47 milk samples positive to *S. microti* growth with or without other bacterial species. All milk samples presented somatic cell count (SCC) <200 x 10<sup>3</sup> cells/mL indicative of intramammary infection.

| Sample number | SCC/ml                | Identified bacterial strains<br>(colony forming unit, CFU)                                                                               | MALDI-TOF score      |
|---------------|-----------------------|------------------------------------------------------------------------------------------------------------------------------------------|----------------------|
| 1             | 1.7 x 10 <sup>5</sup> | <i>Staphylococcus microti</i> (3000 CFU/mL)                                                                                              | 2.03                 |
| 2             | 3.5 x 10 <sup>4</sup> | <i>Staphylococcus microti</i> (6000 CFU/mL)                                                                                              | 2.02                 |
| 3             | 4.2 x 10 <sup>4</sup> | <i>Staphylococcus microti</i> (4000 CFU/mL)                                                                                              | 2.07                 |
| 4             | 1.6 x 10 <sup>4</sup> | <i>Staphylococcus microti</i> (600 CFU/mL)                                                                                               | 2.14                 |
| 5             | 6.2 x 10 <sup>4</sup> | <i>Staphylococcus microti</i> (2000 CFU/mL)<br><i>Escherichia coli</i> (500 CFU/mL)                                                      | 2.08<br>2.23         |
| 6             | 8.7 x 10 <sup>4</sup> | <i>Staphylococcus microti</i> (800 CFU/mL)<br><i>Klebsiella oxytoca</i> (500 CFU/mL)<br><i>Acinetobacter proteolyticus</i> (500 CFU/mL)  | 2.01<br>2.15<br>2.16 |
| 7             | 2.9 x 10 <sup>4</sup> | <i>Staphylococcus microti</i> (2000 CFU/mL)<br><i>Citrobacter freundii</i> (1500 CFU/mL)                                                 | 2.05<br>2.22         |
| 8             | 7.3 x 10 <sup>4</sup> | <i>Staphylococcus microti</i> (600 CFU/mL)<br><i>Raoultella ornithinolyca</i> (1000 CFU/mL)                                              | 2.06<br>2.27         |
| 9             | 9.2 x 10 <sup>4</sup> | <i>Staphylococcus microti</i> (3100 CFU/mL)<br><i>Escherichia coli</i> (500 CFU/mL)<br><i>Staphylococcus saprophyticus</i> (1400 CFU/mL) | 2.02<br>2.47<br>1.96 |
| 10            | 3.7 x 10 <sup>4</sup> | <i>Staphylococcus microti</i> (500 CFU/mL)<br><i>Aeromonas hydrophila</i> (2000 CFU/mL)                                                  | 2.09<br>2.28         |
| 11            | 4.8 x 10 <sup>4</sup> | <i>Staphylococcus microti</i> (1100 CFU/mL)<br><i>Staphylococcus xylosus</i> (500 CFU/mL)<br><i>Aeromonas media</i> (700 CFU/mL)         | 2.07<br>2.23<br>1.70 |
| 12            | 1.1 x 10 <sup>4</sup> | <i>Staphylococcus microti</i> (2000 CFU/mL)<br><i>Escherichia coli</i> (500 CFU/mL)<br><i>Macroccoccus caseolyticus</i> (500 CFU/mL)     | 2.08<br>2.27<br>2.06 |
| 13            | 1 x 10                | <i>Staphylococcus microti</i> (700 CFU/mL)                                                                                               | 2.06                 |
| 14            | 8 x 10 <sup>4</sup>   | <i>Staphylococcus microti</i> (1500 CFU/mL)<br><i>Aeromonas hydrophila</i> (1000 CFU/mL)                                                 | 2.04<br>2.12         |
| 15            | 2.5 x 10 <sup>4</sup> | <i>Staphylococcus microti</i> (1500 CFU/mL)                                                                                              | 2.04                 |
| 16            | 2.8 x 10 <sup>4</sup> | <i>Staphylococcus microti</i> (1500 CFU/mL)<br><i>Aeromonas hydrophila</i> (500 CFU/mL)                                                  | 2.01<br>2.11         |
| 17            | 1.1 x 10 <sup>4</sup> | <i>Staphylococcus microti</i> (500 CFU/mL)                                                                                               | 2.01                 |
| 18            | 2.8 x 10 <sup>4</sup> | <i>Staphylococcus microti</i> (1200 CFU/mL)<br><i>Escherichia coli</i> (1000 CFU/mL)<br><i>Enterococcus aquimarinus</i> (800 CFU/mL)     | 2.12<br>2.26<br>1.76 |
|               | 5.7 x 10 <sup>4</sup> | <i>Staphylococcus microti</i> (600 CFU/mL)                                                                                               | 2.02                 |
| 19            | 2.9 x 10 <sup>4</sup> | <i>Staphylococcus microti</i> (800 CFU/mL)<br><i>Aerococcus viridans</i> (200 CFU/mL)<br><i>Enterococcus aquimarinus</i> (1500 CFU/mL)   | 2.08<br>1.80<br>1.84 |
| 20            | 1.5 x 10 <sup>5</sup> | <i>Staphylococcus microti</i> (2000 CFU/mL)                                                                                              | 2.10                 |
| 21            | 5.8 x 10 <sup>4</sup> | <i>Staphylococcus microti</i> (2000 CFU/mL)                                                                                              | 2.01                 |
| 22            | 6.4 x 10 <sup>4</sup> | <i>Staphylococcus microti</i> (1000 CFU/mL)                                                                                              | 2.01                 |

|    |                       |                                                                                                                                               |                      |
|----|-----------------------|-----------------------------------------------------------------------------------------------------------------------------------------------|----------------------|
| 23 | 1.5 × 10 <sup>5</sup> | <i>Staphylococcus microti</i> (900 CFU/mL)<br><i>Aerococcus viridans</i> (600 CFU/mL)<br><i>Lactococcus lactis</i> (100 CFU/mL)               | 2.10<br>1.96<br>2.00 |
| 24 | 3.1 × 10 <sup>4</sup> | <i>Staphylococcus microti</i> (1000 CFU/mL)<br><i>Escherichia coli</i> (200 CFU/mL)<br><i>Streptococcus uberis</i> (700 CFU/mL)               | 2.12<br>2.29<br>2.11 |
| 25 | 1 × 10 <sup>4</sup>   | <i>Staphylococcus microti</i> (600 CFU/mL)                                                                                                    | 2.04                 |
| 26 | 1.1 × 10 <sup>5</sup> | <i>Staphylococcus microti</i> (500 CFU/mL)<br><i>Escherichia coli</i> (2500 CFU/mL)<br><i>Aerococcus viridans</i> (100 CFU/mL)                | 2.09<br>2.13<br>1.80 |
| 27 | 4.8 × 10 <sup>4</sup> | <i>Staphylococcus microti</i> (500 CFU/mL)<br><i>Staphylococcus epidermidis</i> (500 CFU/mL)                                                  | 2.07<br>2.19         |
| 28 | 5.1 × 10 <sup>4</sup> | <i>Staphylococcus microti</i> (600 CFU/mL)                                                                                                    | 2.01                 |
| 29 | 1.4 × 10 <sup>5</sup> | <i>Staphylococcus microti</i> (800 CFU/mL)<br><i>Microbacterium oxydans</i> (400 CFU/mL)                                                      | 2.08<br>2.03         |
| 30 | 2.6 × 10 <sup>4</sup> | <i>Staphylococcus microti</i> (1000 CFU/mL)<br><i>Staphylococcus sciuri</i> (1200 CFU/mL)<br><i>Aerococcus viridans</i> (800 CFU/mL)          | 2.01<br>2.12<br>1.99 |
| 31 | 7.2 × 10 <sup>4</sup> | <i>Staphylococcus microti</i> (16000 CFU/mL)<br><i>Bacillus licheniformis</i> (1100 CFU/mL)<br><i>Macroccoccus caseolyticus</i> (1100 CFU/mL) | 2.06<br>1.99<br>2.01 |
| 32 | 1.1 × 10 <sup>5</sup> | <i>Staphylococcus microti</i> (800 CFU/mL)<br><i>Escherichia coli</i> (1400 CFU/mL)<br><i>Acinetobacter townneri</i> (300 CFU/mL)             | 2.06<br>2.24<br>1.99 |
| 33 | 5.1 × 10 <sup>4</sup> | <i>Staphylococcus microti</i> (1100 CFU/mL)<br><i>Staphylococcus chromogenes</i> (600 CFU/mL)<br><i>Lactococcus lactis</i> (1300 CFU/mL)      | 2.01<br>2.11<br>1.87 |
| 34 | 1.5 × 10 <sup>4</sup> | <i>Staphylococcus microti</i> (1000 CFU/mL)<br><i>Staphylococcus chromogenes</i> (800 CFU/mL)<br><i>Aerococcus viridans</i> (1000 CFU/mL)     | 2.08<br>2.10<br>1.99 |
| 35 | 8.1 × 10 <sup>4</sup> | <i>Staphylococcus microti</i> (500 CFU/mL)<br><i>Bacillus licheniformis</i> (800 CFU/mL)<br><i>Aerococcus viridans</i> (2900 CFU/mL)          | 2.02<br>2.01<br>1.98 |
| 36 | 2.2 × 10 <sup>4</sup> | <i>Staphylococcus microti</i> (1600 CFU/mL)<br><i>Aerococcus viridans</i> (1800 CFU/mL)                                                       | 2.08<br>2.11         |
| 37 | 3.9 × 10 <sup>4</sup> | <i>Staphylococcus microti</i> (2000 CFU/mL)<br><i>Bacillus licheniformis</i> (1200 CFU/mL)<br><i>Aerococcus viridans</i> (1200 CFU/mL)        | 2.08<br>1.99<br>2.12 |
| 38 | 9.6 × 10 <sup>4</sup> | <i>Staphylococcus microti</i> (2500 CFU/mL)<br><i>Bacillus licheniformis</i> (200 CFU/mL)                                                     | 2.12<br>2.01         |
| 39 | 2.8 × 10 <sup>4</sup> | <i>Staphylococcus microti</i> (1200 CFU/mL)<br><i>Escherichia coli</i> (500 CFU/mL)<br><i>Bacillus licheniformis</i> (200 CFU/mL)             | 2.12<br>2.12<br>2.01 |
| 40 | 1.5 × 10 <sup>4</sup> | <i>Staphylococcus microti</i> (1200 CFU/mL)<br><i>Streptococcus uberis</i> (600 CFU/mL)<br><i>Acinetobacter indicus</i> (200 CFU/mL)          | 2.08<br>2.23<br>1.77 |
| 41 | 6.6 × 10 <sup>4</sup> | <i>Staphylococcus microti</i> (2400 CFU/mL)<br><i>Acinetobacter indicus</i> (500 CFU/mL)<br><i>Bacillus licheniformis</i> (1700 CFU/mL)       | 2.02<br>1.77<br>1.88 |
| 42 | 1.1 × 10 <sup>5</sup> | <i>Staphylococcus microti</i> (700 CFU/mL)<br><i>Aerococcus viridans</i> (4300 CFU/mL)<br><i>Escherichia coli</i> (800 CFU/mL)                | 2.09<br>2.03<br>2.24 |

|    |                   |                                                                                                                               |                      |
|----|-------------------|-------------------------------------------------------------------------------------------------------------------------------|----------------------|
| 43 | $1.6 \times 10^5$ | <i>Staphylococcus microti</i> (800 CFU/mL)<br><i>Escherichia coli</i> (7000 CFU/mL)                                           | 1.90<br>2.19         |
| 44 | $8.4 \times 10^4$ | <i>Staphylococcus microti</i> (1000 CFU/mL)<br><i>Escherichia coli</i> (2000 CFU/mL)                                          | 2.20<br>2.25         |
| 45 | $1.6 \times 10^5$ | <i>Staphylococcus microti</i> (600 CFU/mL)<br><i>Aerococcus viridans</i> (1100 CFU/mL)                                        | 1.95<br>1.98         |
| 46 | $3.3 \times 10^4$ | <i>Staphylococcus microti</i> (200 CFU/mL)<br><i>Escherichia coli</i> (300 CFU/mL)<br><i>Aerococcus viridans</i> (900 CFU/mL) | 2.09<br>2.24<br>1.88 |
| 47 | $1.2 \times 10^5$ | <i>Staphylococcus microti</i> (30000 CFU/mL)<br><i>Aerococcus viridans</i> (600 CFU/mL)                                       | 2.05<br>2.09         |
