# Supplementary material for: Staphylococcus microti Strains Isolated from an Italian Mediterranean Buffalo Herd
Source: MDPI journal article supplement (doi:10.3390/ani13010182), 2023-01-03
Supplement: s1 [file s1]

**Table S2-** – *S. microti* and other bacterial species isolated from 3 milking surface samples

| Sample number | Identified bacterial strains<br>(number of colonies forming units, CFU) | MALDI-TOF score |
|---------------|-------------------------------------------------------------------------|-----------------|
| 1             | <i>Staphylococcus microti</i> (3400 CFU/mL)                             | 2.07            |
|               | <i>Bacillus licheniformis</i> (3000 CFU/mL)                             | 1.88            |
| 2             | <i>Staphylococcus microti</i> (4800 CFU/mL)                             | 2.14            |
|               | <i>Escherichia coli</i> (1600 CFU/mL)                                   | 2.23            |
|               | <i>Acinetobacter indicus</i> (4200 CFU/mL)                              | 1.83            |
| 3             | <i>Staphylococcus microti</i> (2000 CFU/mL)                             | 2.15            |
|               | <i>Acinetobacter towneri</i> (600 CFU/mL)                               | 1.99            |
|               | <i>Corynebacter xerosis</i> (1000 CFU/mL)                               | 1.78            |
